# Impact of low-dose intrathecal morphine on orthopedic surgery: a protocol of a systematic review and meta-analysis of randomized controlled trials

## **Authors**

Yue Lei M.D.1, Mu Guanzhang M.D. 1, Lin Zengmao M.D.2, Sun Haolin M.D.1

Author affiliations

1. Orthopaedic department, Peking University First Hospital, Beijing, China

2. Department of anesthesia, Peking University First Hospital, Beijing, China

## **Correspondent author:**

Sun Haolin

Address: Orthopaedic department; Peking University First Hospital; 8th Avenue, Xicheng

District, Beijing, 100034, China

E-mail: [sunhaolin@vip.163.com](mailto:sunhaolin@vip.163.com)

Telephone: +86 13681146156 Fax: None

## **Key words:**

Orthopedic surgery; intrathecal morphine; analgesics.

# Impact of low-dose intrathecal morphine on orthopedic surgery: a protocol of a systematic review and meta-analysis of randomized controlled trials

## ABSTRACT

**Introduction:** Patients undergoing orthopedic surgery usually suffer considerably from peri-operative pain and intrathecal morphine (ITM) has recently been used as an effective analgesic method. The intrathecal morphine dose achieving optimal analgesia for orthopedic surgery while minimizing side effects has not yet been determined. There is currently a lack of literature synthesis on the safety and effects of low-dose ITM on orthopedic surgery.

**Methods and analysis:** A thorough literature search will be performed on multiple electronic databases and trial registries until January 11<sup>th</sup> 2022, and reference lists will be examined. Two independent reviewers will select studies, extract data and assess the risk of bias and quality of the included studies. We will select randomized controlled trials comparing low-dose ITM ( $\leq 100\mu\text{g}$ ) with high-dose ITM ( $\geq 200\mu\text{g}$ ) or placebo treatment or other comparatives. We will assess the risk of bias using the Cochrane risk of bias tool and Jadad score will be applied to assess the quality of each included trial. We will also use Grading of Recommendations, Assessment, Development, and Evaluation (GRADE) to determine the confidence in effect estimates. Publication bias will be evaluated by visually inspecting funnel plots and Egger regression asymmetry test in estimations of more than 10 trials. Standard meta-analysis will be performed using R package meta.

**Ethics and dissemination:** The results of this systematic review and meta-analysis will be disseminated through peer-reviewed journal and related conferences. The data used in this meta-analysis will not contain individual patient data and ethical approval is therefore not required.

## **INTRODUCTION**

Postoperative pain management is a significant public health concern globally, especially for orthopedic surgery. In clinical practice, patients undergoing orthopedic surgery usually suffer considerably from pain that exists preoperatively, intraoperatively, and postoperatively. Besides, pain can appear as a postoperative complication and may become chronic and last for a long time. Hence, post-surgical analgesia is critical for restoring mobility and maintaining patient satisfaction in the early postoperative period. Traditional peri-operative pain management, effective as it is, relies heavily on opioids orally or intravenously, which may cause overdose of opioids and subsequent side-effects or opioid dependence[1]. Managing pain efficiently with minimal morphine consumption is the goal that orthopedic surgeons and anesthetist should strive to achieve.[2]

Intrathecal morphine (ITM) has been proven to be an ideal solution, firstly induced to clinical application in 1979, as the drug is administered directly into the cerebrospinal fluid, where the opioid acts close to the central nervous system, is effectively performed at dosage of typically no more than 1 mg of morphine [3, 4]. However, previous evidence has shown that both efficacy and side-effects are dose-dependent in various surgical scenarios[4-6]. Therefore, weighing the benefits and potential side effects should be a primary concern when determining the dosage of ITM in clinical use. Compared with a higher dosage, administration of low-dose morphine ( $\leq 100 \mu\text{g}$ ) intrathecally has been validated as the optimal dosage by previous studies, for its effectiveness with minimal side-effects [6, 7]. In recent decades, multiple randomized controlled trials have emerged, proving the efficacy and safety of systematic use of low-dose ITM on patients undergoing orthopedic surgeries, and therefore an updated synthesis of the literature is needed.

## **OBJECTIVE**

To date, no similar systematic review was found as the International Prospective Registry of Systematic Reviews (PROSPERO) and Cochrane Database of Systematic Reviews. This systematic review aims to identify and critically evaluate randomized controlled trials of systematic use of low-dose ITM ( $\leq 100 \mu\text{g}$ ) for patients undergoing orthopedic surgery. A comprehensive understanding of the current level of evidence in the

literature will help clarify the clinical utility of low-dose ITM on orthopedic surgery and inform future research.

## **METHODS AND ANALYSIS**

The protocol was developed according to the Preferred Reporting Items for Systematic Review and Meta-Analysis Protocols (PRISMA-P) and the Cochrane Handbook for Systematic Reviews of Interventions [8, 9].

### **Characteristics of the studies**

The literature search will include studies according to the review's consensus-based criteria, objectives and clinical questions involving four aspects: participants, interventions, comparisons, and outcomes (PICO). RCTs that compared low-dose ITM ( $\leq 100 \mu\text{g}$  of morphine) versus high-dose ITM ( $\geq 200\mu\text{g}$  of morphine) or other non-morphine treatment on orthopedic surgery will be selected according to the recommendations of the Cochrane Group. No language limit will be applied. Non-RCT studies, such as non-randomized cohort studies, case-control studies, case series, case reports, narrative reviews, editorials, or animal researches, will not be included.

### **Eligibility criteria**

Studies will be selected for inclusion if their participants meet specific criteria:

- Patients who underwent orthopedic surgeries, including spinal surgery, joint surgery, bone fracture surgery, or surgery for bone tumors;
- Low-dose ITM was implemented ( $\leq 100 \mu\text{g}$  of morphine).

We will exclude studies that included participants with:

- Comparison group that used morphine administered via other approaches (e.g., intravenous, subcutaneous, or oral) or comparison group of unclear contrast;
- Participants who underwent non-orthopedic surgeries.

### **Outcome measures**

#### *Major outcomes*

- The cumulative dose of analgesics at 24 h postoperatively (converted to morphine equivalent according to Opioid Equivalence Chart by NHS[10]).
- Incidence of common opioid-related side-effect

#### *Minor outcomes*

- Pain intensity at the first 12-24 h after surgery.
- Time to first analgesic requirement after the operation.
- The proportion of patients required rescue analgesics post-operatively.
- Intraoperative blood loss.

### Patient and public involvement

This research will be conducted without patient involvement. Patients will not be invited to participate in study design, results interpretation, or the writing process of the current review.

### Search strategy

We will search the following electronic databases, registries and websites on January 11<sup>th</sup> 2022, unrestricted by date. Grey literature and non-English studies will be not excluded.

- *English Databases:* PubMed, Cochrane library and Web of science,
- *Chinese database:* Cnki.net
- *Trial registries:* ClinicalTrials.gov.

Table 1. Search terms of retrieval of studies

|                  | Search terms                                                                                                                                                                                                                                                                                                                                                                                                                                                                                                        |
|------------------|---------------------------------------------------------------------------------------------------------------------------------------------------------------------------------------------------------------------------------------------------------------------------------------------------------------------------------------------------------------------------------------------------------------------------------------------------------------------------------------------------------------------|
| PubMed           | ((“orthopedic” or “hip” or “knee” or “shoulder” or “elbow” or “ankle” or “wrist” or “extremities” or “spinal” or “intervertebral” or “lumbar” or “cervical” or “scoliosis”) and (“operation” or “instrumentation” or “reduction” or “fixation” or “fusion” or “surgery” or “replacement” or “discectomy” or “arthroplasty” or “implant” or “prosthesis” or “osteotomy” or “arthroscopy”)) and (“intrathecal morphine” or “intrathecal opioids”)                                                                     |
| Cochrane library | #1: (“orthopedic” OR “hip” OR “knee” OR “shoulder” OR “elbow” OR “ankle” OR “wrist” OR “extremities” OR “spinal” OR “intervertebral” OR “lumbar” OR “cervical” OR “scoliosis”): ti, ab, kw<br>#2: (“operation” OR “instrumentation” OR “reduction” OR “fixation” OR “fusion” OR “discectomy” OR “surgery” OR “replacement” OR “arthroplasty” OR “implant” OR “prosthesis” OR “osteotomy” OR “arthroscopy”): ti, ab, kw<br>#3: (“intrathecal morphine” OR “intrathecal opioids”): ti, ab, kw<br>#4: #1 AND #2 AND #3 |
| Web of Science   | TS=(“orthopedic” or “hip” or “knee” or “shoulder” or “elbow” or                                                                                                                                                                                                                                                                                                                                                                                                                                                     |

|                    |                                                                                                                                                                                                                                                                                                                                                                                      |
|--------------------|--------------------------------------------------------------------------------------------------------------------------------------------------------------------------------------------------------------------------------------------------------------------------------------------------------------------------------------------------------------------------------------|
|                    | “ankle” or “wrist” or “extremities” or “spinal” or “intervertebral” or “lumbar” or “cervical” or “scoliosis”) and (“operation” or “instrumentation” or “reduction” or “fixation” or “fusion” or “surgery” or “replacement” or “discectomy” or “arthroplasty” or “implant” or “prosthesis” or “osteotomy” or “arthroscopy”)) AND TS=(“intrathecal morphine” or “intrathecal opioids”) |
| ClinicalTrials.gov | All studies; Condition or disease: orthopedic disorders; Other terms: intrathecal morphine                                                                                                                                                                                                                                                                                           |

\*The search strategy for Chinese literature is provided in Supplementary file 1.

The reference lists of retrieved trials and previous systematic reviews will be searched for citations of potentially eligible trials. In case any questions about trials arise, the corresponding author of the articles will be contacted. The search strategy is shown in Table.1.

### **Selection of studies**

Two independent reviewers (Y.L. and M.G.Z.) will screen the titles and abstracts of the enrolled studies and irrelevant studies will be excluded. Trials selected by the first selection will then be read in full-length article for a second selection. Authors will be contacted if clarification about study design is required. Any occurring disagreements will be noted and then discussed by the whole research group to reach a consensus. The selection process will be presented in a PRISMA flow diagram (Fig. 1) [11].

### **Data extraction and management**

Two independent reviewers (Y.L. and M.G.Z.) will extract data in accordance with the Cochrane Collaboration data extraction form. An independent double-check process will be undertaken by a third reviewer (L.Z.M or S.H.L.) when the extraction process has been finished.

### **Assessing the methodological quality**

The risk of bias for each included RCTs will be assessed by two reviewers (Y.L. and M.G.Z.) independently using the Cochrane risk of bias tool, and the overall quality of each included trial will be assessed by Jaded score[12]. Any disagreement will be resolved by the consensus of the whole group. The graphical presentation of the assessment of the risk of bias will be generated by RevMan 5.3.

We will also apply the Grading of Recommendations, Assessment, Development, and Evaluation (GRADE) approach to evaluate the overall quality of the evidence-based on five domains: limitations of design, inconsistency of results, indirectness, imprecision, and other factors (e.g., publication bias). GRADE approach evaluates the quality of evidence as ‘high’, ‘moderate’, ‘low’, or ‘very low’ by the outcomes [13].

#### **Dealing with missing data**

For articles that did not describe the sample size or results as a mean and SD or standard error of the mean and 95% confidence interval, we will contact the corresponding author for relevant raw data via email. If the corresponding author failed to reply, we will take the median (IQR) as approximations of the mean (SD), by estimating the mean as equivalent to the median, and the SD as the IQR divided by 1.35, or the range divided by 4 as Gonver et, al. did [6].

#### **Data synthesis and analysis**

The results from finally screened studies will be combined to estimate as effective results in standardized mean differences (SMD) and 95% CI for continuous outcomes. As to dichotomous outcomes, pooled risk ratio (RR) and 95% CI will be estimated. The synthesis will be done by generating a forest plot of the study estimates. We will evaluate the heterogeneity of the included studies with  $I^2$  test. Heterogeneity will be examined by  $I^2$  value as low, moderate or high ( $I^2$  value of 25%, 50% and 75% respectively). Statistical significance will be set at  $P < 0.05$  in this review.

#### **Assessment of publication biases**

If there are over 10 trials included in the meta-analysis, reporting bias will be examined by constructing funnel plots and performing Egger regression asymmetry test[14].

#### **Sensitivity analysis**

To confirm the robustness of our findings, a sensitivity analysis will be conducted by omitting the data from the trial one by one from the pooled analysis.

#### **AUTHOR CONTRIBUTIONS**

Y.L. conceived the research questions, designed the search strategy and prepared the manuscript draft. M.G.Z. designed search strategy, edited the manuscript. Y.L. and M.G.Z.

will independently screen the potential studies, extract data and assess the risk of bias from included studies. Y.L. and M.G.Z. revised the search strategy and the manuscript. L.Z.M. and S.H.L. revised the manuscript and approved the final version and will arbitrate potential disagreements. All authors approved the final version of this manuscript.

## **COMPETING INTERESTS**

The authors declare that they have no competing interests.

## **FUNDING**

This study is granted by Interdisciplinary clinical research project of Peking University First Hospital (Grant number: 2021CR31).

## **PATIENT CONSENT**

Not required.

## **ETHICS APPROVAL**

Not required.

## **DATA SHARING STATEMENT**

Data are available upon reasonable request.

## **REFERENCES**

1. Buckenmaier CC, 3rd: **The role of pain management in recovery following trauma and orthopaedic surgery.** *J Am Acad Orthop Surg* 2012, **20** Suppl 1:S35-38.
2. Trasolini NA, McKnight BM, Dorr LD: **The Opioid Crisis and the Orthopedic Surgeon.** *J Arthroplasty* 2018, **33**(11):3379-3382. e3371.
3. Wang JK, Nauss LA, Thomas JE: **Pain relief by intrathecally applied morphine in man.** *Anesthesiology* 1979, **50**(2):149-151.



4. Gehling M, Tryba M: **Risks and side-effects of intrathecal morphine combined with spinal anaesthesia: a meta-analysis.** *Anaesthesia* 2009, **64**(6):643-651.
5. Sultan P, Halpern SH, Pushpanathan E, Patel S, Carvalho B: **The Effect of Intrathecal Morphine Dose on Outcomes After Elective Cesarean Delivery: A Meta-Analysis.** *Anesth Analg* 2016, **123**(1):154-164.
6. Gonvers E, El-Boghdady K, Grape S, Albrecht E: **Efficacy and safety of intrathecal morphine for analgesia after lower joint arthroplasty: a systematic review and meta-analysis with meta-regression and trial sequential analysis.** *Anaesthesia* 2021, **76**(12):1648-1658.
7. Kirson LE, Goldman JM, Slover RB: **Low-dose intrathecal morphine for postoperative pain control in patients undergoing transurethral resection of the prostate.** *Anesthesiology* 1989, **71**(2):192-195.
8. Shamseer L, Moher D, Clarke M, Ghersi D, Liberati A, Petticrew M, Shekelle P, Stewart LA: **Preferred reporting items for systematic review and meta-analysis protocols (PRISMA-P) 2015: elaboration and explanation.** *Bmj* 2015, **350**:g7647.
9. Higgins JPT TJ, Chandler J, Cumpston M, Li T, Page MJ, Welch VA (editors). : **Cochrane Handbook for Systematic Reviews of Interventions version 6.2 (updated February 2021).** *Cochrane*, 2021, Available from [www.training.cochrane.org/handbook](http://www.training.cochrane.org/handbook).
10. Gloucestershire Hospitals NFT: **Opioid Equivalence Chart.** July 2011, <https://www.gloshospitals.nhs.uk/gps/treatment-guidelines/opioid-equivalence-chart/>.

11. Page MJ, McKenzie JE, Bossuyt PM, Boutron I, Hoffmann TC, Mulrow CD, Shamseer L, Tetzlaff JM, Akl EA, Brennan SE *et al*. **The PRISMA 2020 statement: an updated guideline for reporting systematic reviews.** *Bmj*2021, **372**:n71.
12. Jadad AR, Moore RA, Carroll D, Jenkinson C, Reynolds DJ, Gavaghan DJ, McQuay HJ: **Assessing the quality of reports of randomized clinical trials: is blinding necessary?** *Control Clin Trials* 1996, **17**(1):1-12.
13. Guyatt G, Oxman AD, Akl EA, Kunz R, Vist G, Brozek J, Norris S, Falck-Ytter Y, Glasziou P, DeBeer H *et al*. **GRADE guidelines: 1. Introduction-GRADE evidence profiles and summary of findings tables.** *J Clin Epidemiol*2011, **64**(4):383-394.
14. Egger M, Davey Smith G, Schneider M, Minder C: **Bias in meta-analysis detected by a simple, graphical test.** *Bmj*1997, **315**(7109):629-634.
